# Supplementary material for: Cation-Exchange in Metal-Organic Framework as a Strategy to Obtain New Material for Ascorbic Acid Detection
Source: Nanomaterials (Basel). 2022 Dec 18;12(24):4480. doi: 10.3390/nano12244480 (PMC9786631; doi:10.3390/nano12244480)
Supplement: Supplementary file 1 [file nanomaterials-12-04480-s001.zip › nanomaterials-2057652-supplementary.pdf]

# **Cation-Exchange in Metal–Organic Framework as a Strategy to Obtain New Material for Ascorbic Acid Detection**

**Weronika Bodylska <sup>1,\*</sup>, Marzena Fandzloch <sup>1</sup>, Rafał Szukiewicz <sup>2</sup> and Anna Lukowiak <sup>1</sup>**

<sup>1</sup> Institute of Low Temperature and Structure Research, Polish Academy of Sciences, Okólna 2, 50-422 Wrocław, Poland

<sup>2</sup> Faculty of Physics and Astronomy, University of Wrocław, pl. M. Borna 9, 50-204 Wrocław, Poland

\*Corresponding author: [w.bodylska@intibs.pl](mailto:w.bodylska@intibs.pl)

## Table of Contents

|           |       |   |
|-----------|-------|---|
| Table S1  | ..... | 3 |
| Figure S1 | ..... | 3 |
| Figure S2 | ..... | 4 |
| Figure S3 | ..... | 5 |
| Figure S4 | ..... | 6 |
| Figure S5 | ..... | 6 |
| Table S2  | ..... | 7 |

**Table S1.** Content of Eu and Cu (wt.%) in  $\text{NH}_4[\text{Cu}_3(\mu_3\text{-OH})(\mu_3\text{-4-carboxypyrazolato})_3]$  after different times of cation-exchange process based on ICP-OES.

| Sample                      | Element content (wt.%) |
|-----------------------------|------------------------|
| 2 h of ion-exchange process | Cu: $26.16 \pm 0.83$   |
|                             | Eu: $2.66 \pm 0.18$    |
| 4 h of ion-exchange process | Cu: $26.27 \pm 0.54$   |
|                             | Eu: $3.33 \pm 0.04$    |
| 6 h of ion-exchange process | Cu: $26.91 \pm 0.41$   |
|                             | Eu: $4.30 \pm 0.05$    |

As far as the cation exchange time is concerned, shorter (2 h) and longer (6 h) time was also tested. Eu@Cu-MOF obtained after 2 h of the cation-exchange process showed a characteristic emission band of europium at 617 nm and a broad copper-originating band for the concentration of AA of  $2.84 \times 10^{-3}$  M (Figure S1a) but not for lower concentrations. For the initially proposed time of the ion-exchange process (4 h) the detection limit of AA was much lower (set up at  $3.55 \times 10^{-4}$  M). The longer time, up to 6 h of the process, did not change the detection limit of AA (Figure S1b). As presented in Table S1, the europium content in the sample after 2 h of the ion-exchange process was estimated to be 2.66 wt.%, which is lower than in the system after 4 h of reaction (3.33 wt.%). Therefore, it may explain the lower sensitivity of the system after 2 h-exchange. On the other hand, europium content in the sample after 6 h of the ion-exchange process was higher than for 4 h (4.30 wt.%); however, it did not change the detection limit of the proposed system.

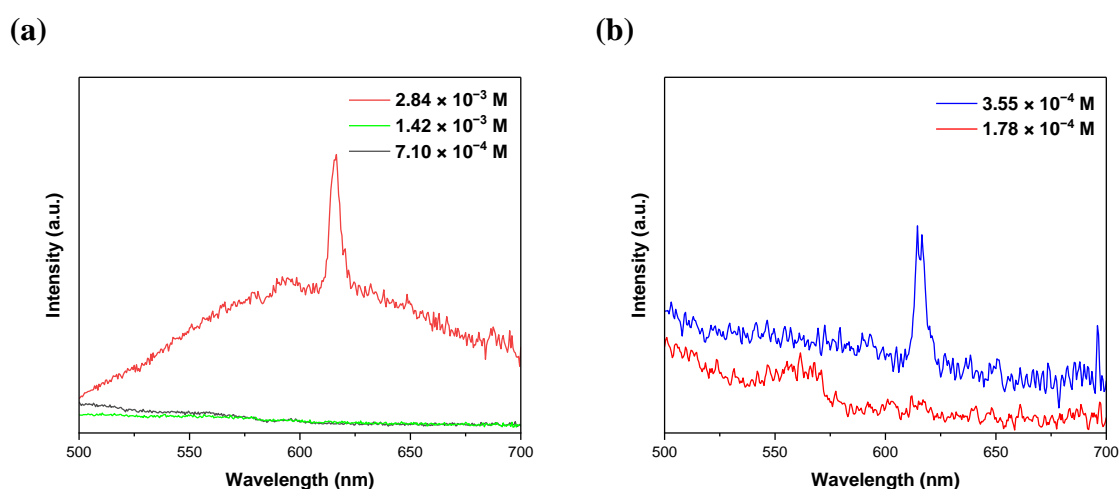

**Figure S1.** Emission spectra of Eu@Cu-MOF after cation exchange for 2 h (a) and 6 h (b) for different concentrations of AA (after treatment for 15 min).

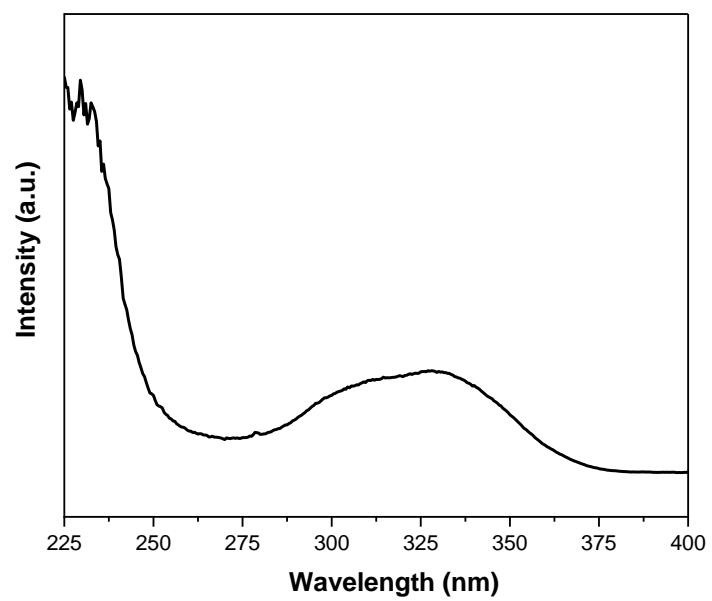

**Figure S2.** Excitation spectra of Eu@Cu-MOF ( $\lambda_{\text{em}} = 616.5$  nm).

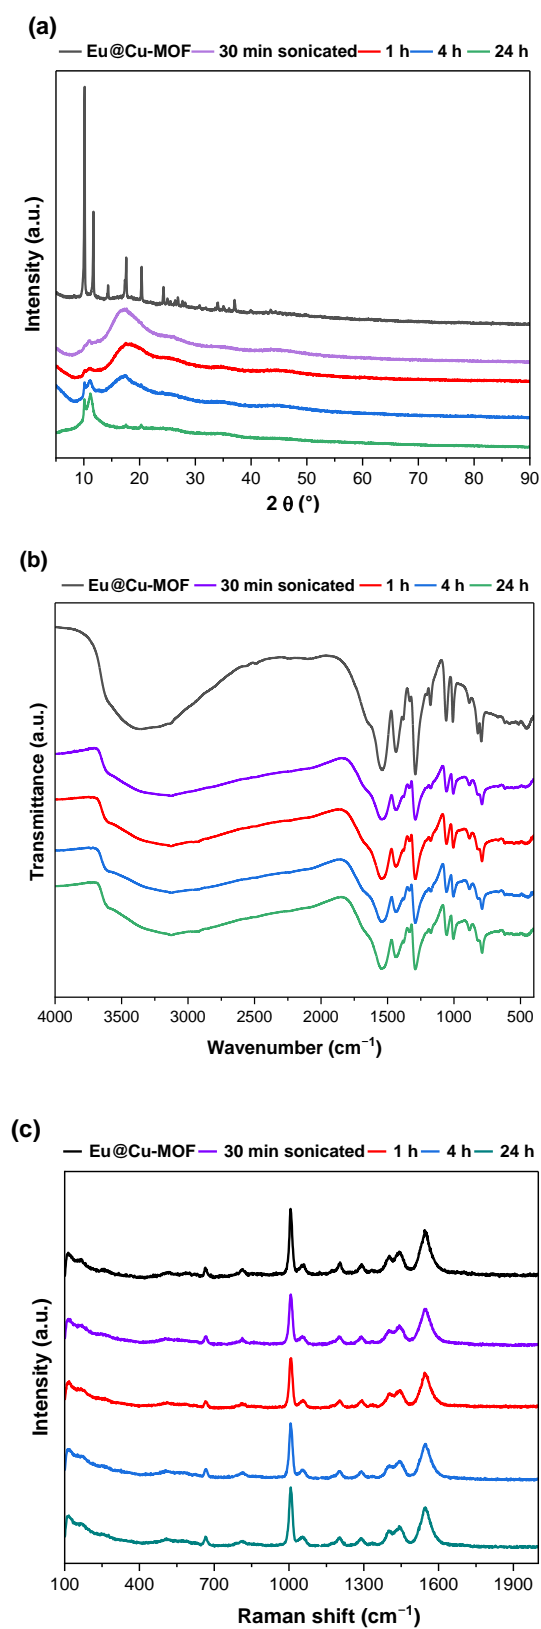

**Figure S3.** Determination of stability of Eu@Cu-MOF in deionized water using (a) XRD, (b) IR, and (c) Raman spectroscopy.

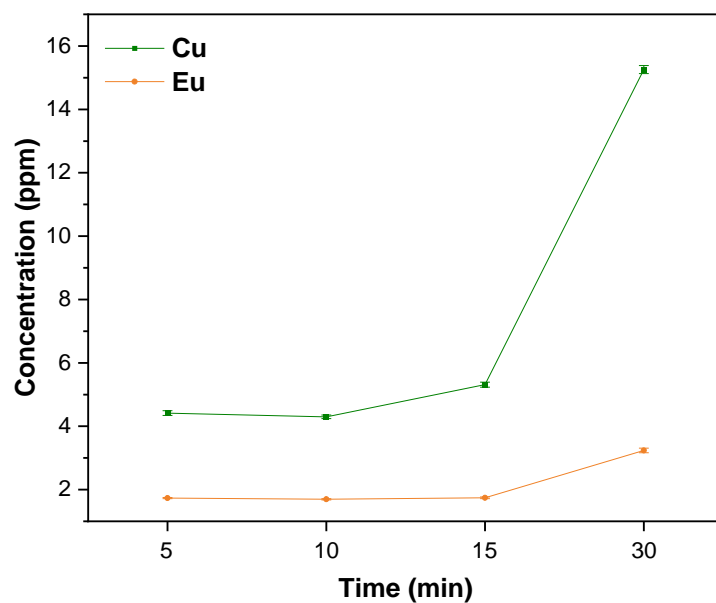

**Figure S4.** Changes in the concentration of europium and copper in the solution after treatment of Eu@Cu-MOF with ascorbic acid.

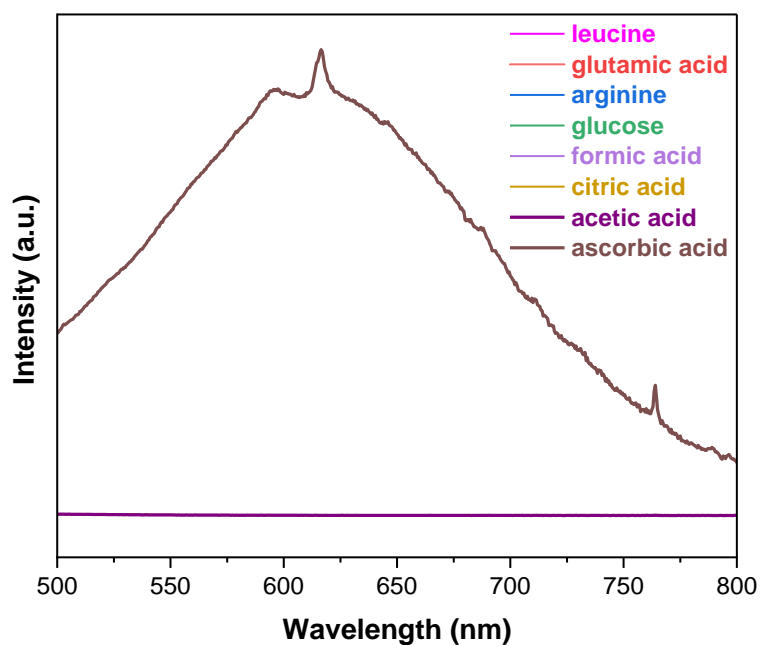

**Figure S5.** Emission spectra for Eu@Cu-MOF for different aqueous solutions of biological molecules and carboxylic acids at a concentration of  $1.00 \times 10^{-2}$  M.

**Table S2.** Relative composition (%) of the Cu species.

|           | <b>Cu(II)–O<sub>ligand</sub></b> | <b>Cu(II)–O<sub>cluster</sub></b> | <b>Cu(I)</b> |
|-----------|----------------------------------|-----------------------------------|--------------|
| Eu@Cu-MOF | 84.49                            | 15.51                             | 0            |
| 5 min     | 89.03                            | 6.27                              | 4.7          |
| 30 min    | 87.8                             | 7.17                              | 5.03         |
